# Supplementary figures and images for: Strain-tunable electric structure and magnetic anisotropy in monolayer CrSI
Source: Royal Society of Chemistry journal article supplement (doi:10.1039/c9cp03535d), 2019-01-01

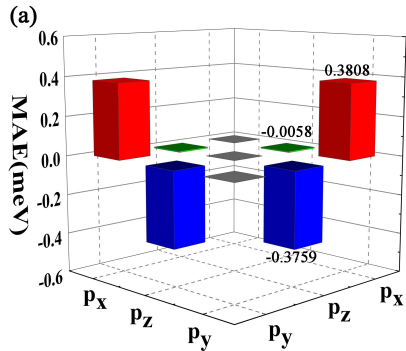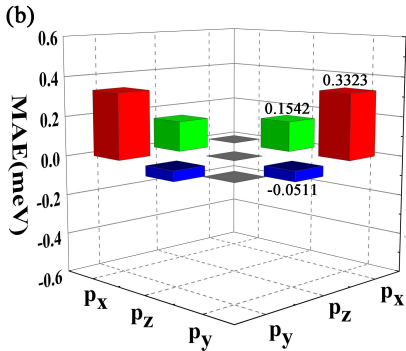

Supplement: c9cp03535d4.pdf [file c9cp03535d4.pdf]
